# Supplementary material for: Active Sampling Device for Determining Pollutants in Surface and Pore Water – the In Situ Sampler for Biphasic Water Monitoring
Source: PubMed Central journal article supplement (PMC4764808; doi:10.1038/srep21886), 2016-02-24
Supplement: srep21886-s1.pdf [file srep21886-s1.pdf]

1  
2

## Supplementary Information

3 **Active Sampling Device for Determining Pollutants in Surface and Pore Water – the In**  
4 **Situ Sampler for Biphasic Water Monitoring**

5 Samuel D. Supowit, Isaac B. Roll, Viet D. Dang, Kevin J. Kroll, Nancy D. Denslow, Rolf U.  
6 Halden\*

7 \* Rolf U. Halden; (P): 480-727-0893; email: Rolf.Halden@asu.edu

8

9 Pages (13)  
10  
11 Figures (2)  
12  
13 Tables (2)

## 14 **Quality Assurance**

15 **Solvents and standards.** Neat analytical standards of fipronil and fipronil-desulfinyl were  
16 purchased from Sigma Aldrich (St. Louis, MO). Neat analytical standards of fipronil sulfide,  
17 sulfone, and amide were manufactured by Bayer and Basf (Ludwigshafen, Germany). Organic  
18 solvents and Fluka brand liquid chromatography mass spectrometry (LCMS) grade water were  
19 purchased from Sigma Aldrich, while Optima brand LCMS grade water was purchased from  
20 Fisher Scientific (Fair Lawn, NJ). Fipronil des F3 (a fipronil analog) was purchased from Dr.  
21 Ehrenstorfer labs (Augsburg, Germany). Individual standard solutions of the target compounds  
22 were prepared by dissolving 10 mg neat standard into 10.0 mL of acetonitrile, or toluene, in the  
23 case of fipronil desulfinyl. Solutions were then vortexed until dissolution was complete, yielding  
24 1.0 g/L standards from which serial dilution produced commingled standard solutions ranging  
25 from 5 mg/L to 1  $\mu$ g/L in acetonitrile. Separate standards of fipronil desulfinyl were prepared for  
26 GC-MS/MS calibration in hexane.

27 **Pump performance.** The IS2B peristaltic pump was calibrated prior to each analysis. Two  
28 replicate benchtop tests were performed to ascertain the precision of the pump. Results are  
29 shown in supplementary table S1. Multiple trials with this device indicated that one type of  
30 tubing (PharMed) provided greater consistency in pump performance than did others (e.g.,  
31 Viton), probably due to the tendency of the latter to deform permanently when pinched by the  
32 pump rollers. During the recovery tests, the ISMATEC control unit was set to deliver 200 mL at  
33 a pump rate of 140  $\mu$ L/min/channel to each of the six channels in two consecutive runs ( $n = 12$ ).

34 **Sample collection.** Sediment field blanks were collected from locations about 50 yards from the  
35 edge of the wetland. The sediment was not impacted by the wastewater effluent, and was

36 therefore used as a quality control. Water field blanks were DI water samples transported from  
37 Arizona State University to the wetland, and transferred there into ashed media bottles.

38 **Analytcs.** Calibration standard response accuracy had to be within 20% of expected values.  
39 Level 1 QA/QC for quantitation of fiproles was performed using lab control spikes. The absolute  
40 recovery of spiked mass was compared to “clean” calibration standards in 1:1 acetonitrile:water  
41 (for LC-MS/MS analysis) or 100% hexane (for GC-MS/MS analysis), and these results are  
42 displayed in supplementary table S2. Unspiked equipment blanks were used as controls, and the  
43 method of quantitation required subtraction of the equipment blank signal from that of the spiked  
44 samples.

45 **Recovery tests.** Water laden with dissolved organic carbon (DOC) was generated by adding 100  
46 mg potassium citrate to 3 L of 18.2 MΩ (Milli-Q) water. The water was spiked to 300 ppm (v/v)  
47 with Kathon CG/ICP biocide and stored at room temperature in ashed amber media bottles. 2000  
48 mL was transferred to a 2-L ashed media bottle and was spiked with 20 ng (nominal  
49 concentration 10 ng/L) of the fipronil parent compound, along with the sulfide, sulfone, and  
50 amide degradates. A separate 2-L sample of water was spiked with 2 ng (nominal concentration  
51 1 ng/L) with fipronil-desulfinyl. Both samples were extracted in separate tests as described  
52 below.

53 For bench top extraction, the sampler was assembled with two 3-channel PTFE manifolds for  
54 water inlet, and six 1-mL SDB-L SPE cartridges (25 mg of resin), conditioned and rinsed with  
55 acetonitrile and LCMS grade water, respectively. Both IS2B inlet tubes were placed into the  
56 spiked lab-created water with the IS2B control unit set to deliver 200 mL at 140 µL/min/channel.  
57 The effluent tubes from the SPE cartridge were each placed into separate weighed 1000 mL

58 media bottles. At the end of the pumping period, the SPE cartridges were rinsed with 1 mL  
59 LCMS water, and eluted with 1 mL of acetonitrile, followed by 1 mL of 1:1 hexane:acetone. The  
60 serial eluates from each channel were combined, divided into two 1 mL aliquots, evaporated  
61 under nitrogen, and one set of aliquots was reconstituted to 1 mL of acetonitrile (ACN), while  
62 the other was reconstituted to 1 mL hexane. The resulting ACN solutions were diluted by 50%  
63 with water, and the ACN/H<sub>2</sub>O samples were analyzed by LC-MS/MS for fipronil and the  
64 sulfide, sulfone, and amide degradate, while the samples in hexane were analyzed by GC-  
65 MS/MS for the desulfinyl degradate. In order to determine the background concentrations of the  
66 five analytes in the matrix, 200 mL of lab-created unspiked DOC-laden water was extracted by  
67 the IS2B in triplicate, along with 200 mL of 18.2 M $\Omega$  water (in triplicate). Absolute recoveries  
68 were calculated by the background subtraction method. Reagent blanks returned no peaks, but  
69 unspiked control matrices returned peaks with areas similar to the lowest calibration point (10  
70 ng/L).

71 After the recovery test, the pump calibration was assessed by comparing the set volume on the  
72 control unit with the volumes collected in the effluent capture bottles. The volumes were  
73 determined by dividing the mass difference between the empty and full bottles by the density of  
74 water.

75 A similar procedure was used to determine the recovery efficiency using an AutoTrace 280 by  
76 Dionex (Sunnyvale, CA). Because the AutoTrace was equipped with 3 mL rather than 1 mL  
77 adaptors, it was loaded with 500 mg/3mL SDB cartridges (8 replicates total), which were  
78 conditioned as described above. Benchtop comparisons indicated that the 25 mg and 500 mg  
79 resin beds performed similarly, but 500 mg cartridges were on hand for this study. 200 mL of  
80 spiked DOC-laden water with 1 ng/L of targets was loaded onto each cartridge at 1 mL/min, and

81 eluted serially with 2 mL of acetonitrile and 2 mL of hexane:acetone (1:1) at 1 mL/min. The  
82 eluates were commingled and blown down to dryness under nitrogen before being reconstituted  
83 to 2 mL of acetonitrile. These samples were split for GC-MS/MS analysis and LC-MS/MS  
84 analysis. LC samples were diluted by 50% with LCMS grade water prior to analysis. GC  
85 samples were solvent switched to hexane prior to analysis.

86 **Method Detection Limit.** A sample of lab-generated water (as described above) was used to  
87 determine the baseline signal for each analyte. Nine replicate samples were generated, and two  
88 were subsequently omitted, resulting in six degrees of freedom. The method detection limit  
89 (MDL) was calculated as described by the Environmental Protection Agency.<sup>1</sup> This method was  
90 used to determine the MDL using both the AutoTrace and IS2B preconcentration devices. Since  
91 the IS2B and AutoTrace each have six channels, the process was run twice: once with three  
92 spiked replicates and three unspiked controls, and once with six spiked replicates. A student's t-  
93 value (99% confidence interval) of 3.14 was used, and was multiplied by the standard deviation  
94 of 7 replicates. The calculated MDLs were checked against the following criteria:

95 MDL < spike level

96 Spike level < 10 x MDL

97 70 % < Absolute recovery < 130%

98 Signal-to-noise ratio < 10

99 **Porewater filtration.** One concern about sampling porewater *in situ* was that mobile particulates  
100 would clog the frits of SPE cartridges and inhibit flow. This concern was addressed by (1)

101 visually inspecting the quality of the filtered porewater (supplementary figure S1), and (2) by  
102 measuring volumes of filtered porewater delivered to cartridges.

### 103 **Sample preparation/breakthrough test**

104 **IS2B.** The IS2B was set to deliver 200 mL at 70  $\mu\text{L}/\text{min}$  and 140  $\mu\text{L}/\text{min}$  to 25 mg polystyrene  
105 divinylbenzene (SDB) cartridges. In both a lab and field test, 100 mg C18 cartridges were placed  
106 downstream of the SDB in order to ascertain whether any analyte mass passed through the initial  
107 SDB cartridges. The cartridges were immediately eluted serially with 1 mL acetonitrile and 1 mL  
108 1:1 hexane:acetone. The breakthrough cartridge eluates indicated no fiproles broke through the  
109 initial SDB cartridges.

110 **In-lab water sample extractions.** The AutoTrace 280 was equipped with 500 mg/3 mL SDB  
111 cartridges. The AutoTrace program is as follows:

- 112 1. Condition cartridge with 4.0 mL of acetonitrile into aqueous waste.
- 113 2. Condition cartridge with 2.0 mL Milli-Q water.
- 114 3. Load 200.0 mL of sample onto cartridge.
- 115 4. Rinse cartridge with 2.0 mL of Milli-Q water into aqueous waste.
- 116 5. Dry cartridge with nitrogen gas for 10.0 minutes.
- 117 6. Soak and collect 0.5 mL fraction using acetonitrile.
- 118 7. Collect 2.0 mL fraction into sample tube using acetonitrile.
- 119 8. Collect 2.0 mL fraction into sample tube using 1:1 hexane:acetone.

120 All eluates were solvent switched to either 1:1 acetonitrile:water or 100% hexane for LC-MS/MS  
121 or GC-MS/MS analysis, respectively.

## 122 **Instruments and analysis**

123 TOC of sediment samples was analyzed using a Shimadzu TOC Solid Sample Module SSM-  
124 5000A (Shimadzu Scientific Instruments, Inc., Columbia, MD), while TOC of water samples  
125 was assessed using a Shimadzu TOC-5000 analyzer. Fipronil and the sulfide, sulfone, and amide  
126 degradates were quantified using liquid chromatography negative electrospray ionization tandem  
127 mass spectrometry (LC-ESI-MS/MS) with background signal subtraction. Fipronil-desulfinyl  
128 was quantified using gas chromatography tandem mass spectrometry (GC-MS/MS) with  
129 background signal subtraction. LC mass spectrometric analyses were performed using an API-  
130 4000 MS/MS (Applied Biosystems, Framingham, MA) coupled to a Shimadzu Prominence  
131 HPLC controlled by Analyst 1.5 software (Applied Biosystems, Framingham, MA). Separation  
132 was done using an Ultra IBD column (5  $\mu\text{m}$  particle size, 2.1  $\times$  150 mm; Restek Corporation,  
133 Bellefonte, PA). The mobile phase consisted of 40% acetonitrile and 60% water flowing at a rate  
134 of 400  $\mu\text{L}/\text{min}$  with a total runtime of 12 min, with a gradient profile of 10% ACN/min starting  
135 at  $t = 1.00$  min. Analytes were introduced into the mass spectrometer using an electrospray  
136 ionization probe operating in negative mode, and multiple reaction monitoring (MRM) was used  
137 for qualitative analysis. Optimized conditions for the ionization and fragmentation of the  
138 analytes are specified below. Quantitation was performed using a 5 point calibration curve in 1:1  
139 acetonitrile:water. GC mass spectrometric analysis was performed using an Agilent 7890 gas  
140 chromatograph coupled to an Agilent 7000 triple quadrupole mass spectrometer (Agilent  
141 Technologies, Santa Clara, CA) operating in positive mode, and MRM was used for qualitative  
142 analysis. Absolute recovery of all compounds was performed by using 4- or 5-point calibration  
143 curves and subtracting the concentration in the unspiked matrices from those of the spiked  
144 matrices. Equipment blanks using 18.2 M $\Omega$  (Milli-Q) water were run prior to all deployments,  
145 and grab sample controls included field blanks of Milli-Q water.

146 **GC-MS/MS Method (Agilent 7890 GC/7000 QQQ)**

147 **GC parameters**

Inj. Volume: 1.0 uL

Oven

Heater: 280 °C

70 °C for 0.1 min

Flow: 1.2 mL/min

then 40 °C/min to 250 °C for 0 min

Pressure: 10.966 psi

then 40 °C/min to 300 °C for 0.2 min

Column: HP-5MS 5% Phenyl Methyl Silox

5 min (Post Run): 300 °C

30 m x 250 µm x 0.25 µm

Mode: Splitless

**Mass spectrometer parameters**

**Fipronil-desulfinyl**

| Q1 Mass (Da) | Q3 Mass (Da) | Dwell(msec) | CE |
|--------------|--------------|-------------|----|
|--------------|--------------|-------------|----|

|     |     |     |       |
|-----|-----|-----|-------|
| 388 | 333 | 150 | 25.00 |
|-----|-----|-----|-------|

| Q1 Mass (Da) | Q3 Mass (Da) | Dwell(msec) | CE |
|--------------|--------------|-------------|----|
|--------------|--------------|-------------|----|

|     |     |     |       |
|-----|-----|-----|-------|
| 388 | 281 | 150 | 30.00 |
|-----|-----|-----|-------|

**LC-MS/MS Method**

**LC parameters (Shimadzu Prominence HPLC)**

Shimadzu LC system Injection Volume = 20.00 µl

Pump Model: LC-20AD

Pumping Mode: Binary Flow



Total Flow: 0.4000 mL/min

Time Program

| Time (min) | % Methanol |
|------------|------------|
| 0.01       | 40         |
| 1.00       | 40         |
| 6.00       | 90         |
| 8.00       | 90         |
| 8.50       | 40         |
| 9.00       | 40         |
| 11.00      | Stop       |

**Mass spec parameters (AB Sciex API 4000)**

**Fipronil**

| Q1 Mass (Da) | Q3 Mass (Da) | Dwell(msec) | DP     | CE     |
|--------------|--------------|-------------|--------|--------|
| 434.95       | 329.90       | 80.00       | -70.00 | -24.00 |

| Q1 Mass (Da) | Q3 Mass (Da) | Dwell(msec) | DP     | CE     |
|--------------|--------------|-------------|--------|--------|
| 434.95       | 250.00       | 80.00       | -70.00 | -38.00 |

Fipronil sulfide

| Q1 Mass (Da) | Q3 Mass (Da) | Dwell(msec) | DP     | CE     |
|--------------|--------------|-------------|--------|--------|
| 418.70       | 382.80       | 80.00       | -75.00 | -18.00 |

| Q1 Mass (Da) | Q3 Mass (Da) | Dwell(msec) | DP     | CE     |
|--------------|--------------|-------------|--------|--------|
| 418.70       | 262.10       | 80.00       | -75.00 | -40.00 |

**Fipronil sulfone**

| Q1 Mass (Da) | Q3 Mass (Da) | Dwell(msec) | DP     | CE     |
|--------------|--------------|-------------|--------|--------|
| 450.85       | 414.71       | 80.00       | -70.00 | -40.00 |

| Q1 Mass (Da) | Q3 Mass (Da) | Dwell(msec) | DP     | CE     |
|--------------|--------------|-------------|--------|--------|
| 450.85       | 281.84       | 80.00       | -70.00 | -40.00 |

**Fipronil amide**

| Q1 Mass (Da) | Q3 Mass (Da) | Dwell(msec) | DP     | CE     |
|--------------|--------------|-------------|--------|--------|
| 386.74       | 350.84       | 80.00       | -70.00 | -40.00 |

| Q1 Mass (Da) | Q3 Mass (Da) | Dwell(msec) | DP     | CE     |
|--------------|--------------|-------------|--------|--------|
| 386.74       | 281.89       | 80.00       | -70.00 | -40.00 |

**Supplementary Table S1.** In two replicate runs, each of six channels was calibrated to deliver 200 mL at 140  $\mu\text{L}/\text{min}$ . Individual channel volumes were measured by mass, assuming a fluid density of 1.0 g/mL.

| Channel | Vol delivered (mL) | Abs error (mL) | %Error |
|---------|--------------------|----------------|--------|
| Trial 1 |                    |                |        |
| 1       | 203.7              | 3.7            | 2%     |
| 2       | 190.8              | -9.2           | 5%     |
| 3       | 202.8              | 2.8            | 1%     |
| 4       | 219.7              | 19.7           | 10%    |
| 5       | 195.6              | -4.4           | 2%     |
| 6       | 180.8              | -19.2          | 10%    |
| Trial 2 |                    |                |        |
| 1       | 219.1              | 19.1           | 10%    |
| 2       | 187.1              | -12.9          | 6%     |
| 3       | 216.5              | 16.5           | 8%     |
| 4       | 219.6              | 19.6           | 10%    |
| 5       | 192.9              | -7.1           | 4%     |
| 6       | 211.0              | 11.0           | 6%     |
| Avg     | 203.3              | 3.3            | 6%     |
| Stdv    | 13.9               |                | 3%     |

**Supplementary Table S2.** IS2B absolute recoveries of fiproles from lab water (n = 8).

| Chemical    | Spike level (ng/L) | Recovery (%) | SD (%) |
|-------------|--------------------|--------------|--------|
| Fipronil    | 10                 | 103          | 15     |
| -sulfide    | 10                 | 82           | 14     |
| - sulfone   | 10                 | 89           | 13     |
| -amide      | 10                 | 90           | 14     |
| -desulfinyl | 1                  | 110          | 18     |

Matrix:

33 mg/L potassium citrate

300 ppm Kathon

Milli-Q water

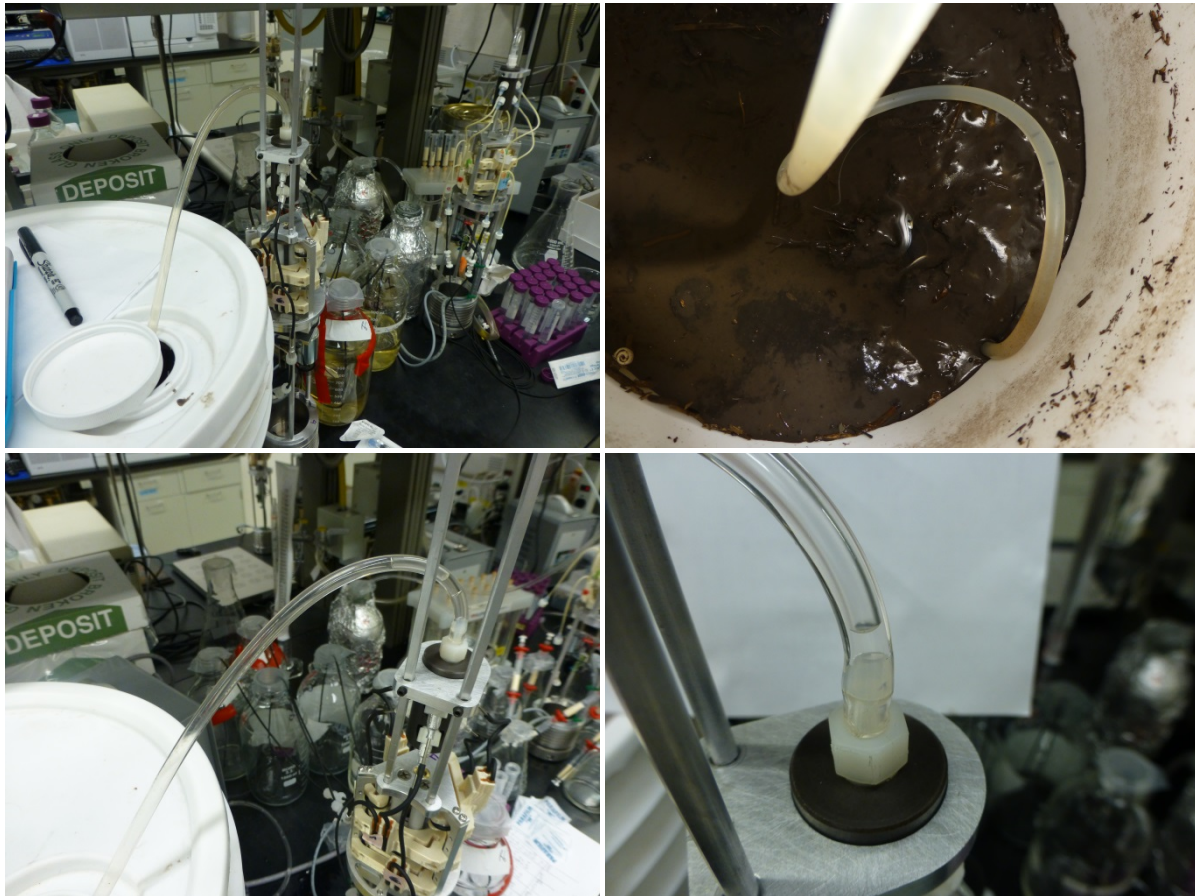

**Supplementary Figure S1.** The IS2B inlet is immersed in high-OC sediment ( $> 30\%$  OC) and is drawing water at  $100 \mu\text{L}/\text{min}$ . The clear plastic tubing shown carries the filtered pore water. Plastic tubing shown is for demonstration purposes only. Actual inlet tubing is PTFE.

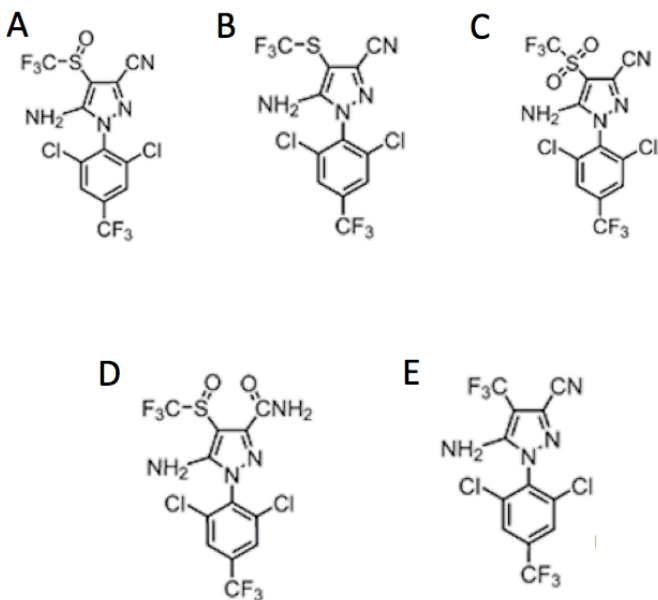

**Supplementary Figure S2.** Chemical structures of the parental pesticide, fipronil (A), and its transformation products fipronil sulfide (B), fipronil sulfone (C), fipronil amide (D), and fipronil-desulfinyl (E).

## References

1. USEPA, Appendix B to Part 136 - Definition and procedure for the determination of the method detection limit-revision 1.11. In 2011.
